# Supplementary material for: Identification of a unique humoral immune signature of Sudan ebolavirus persistence in human survivors
Source: Research Square preprint supplement (doi:10.21203/rs.3.rs-9601480/v1), 2026-05-26
Supplement: Supplementary file 1 [file f00e2eee64b3911f5be2b68e.pdf]

### A. ADNP

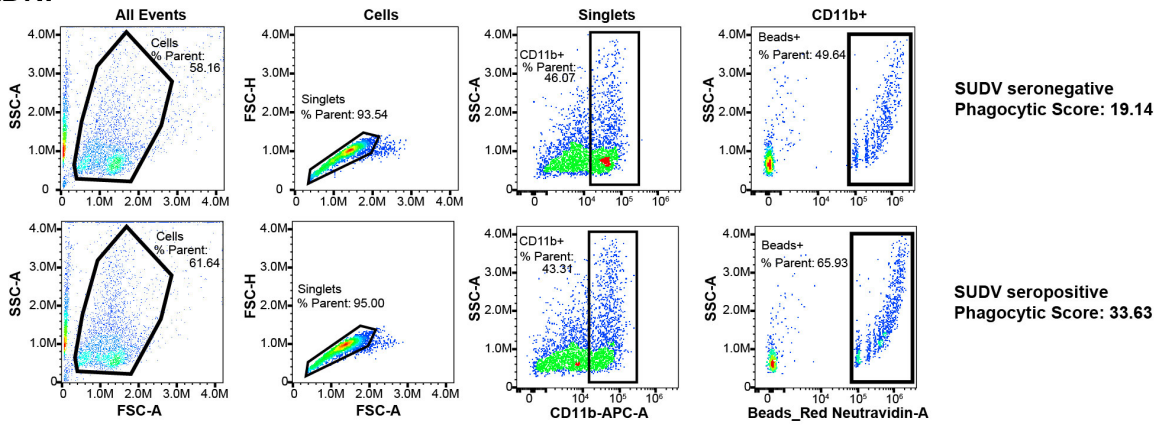

### B. ADCP

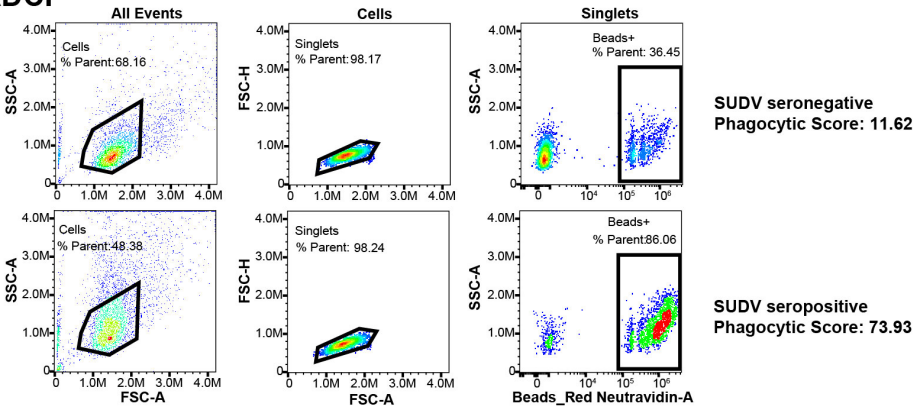

### C. ADCD

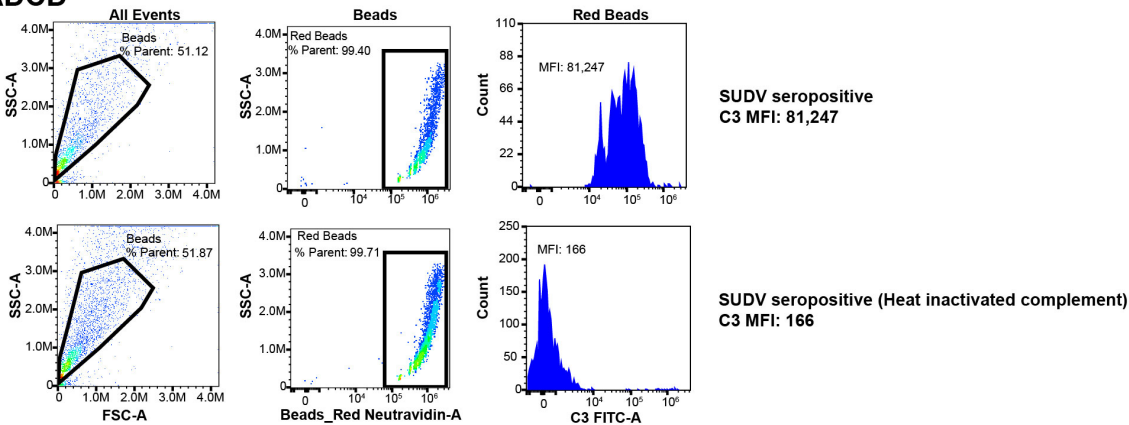

### D. ADNKA

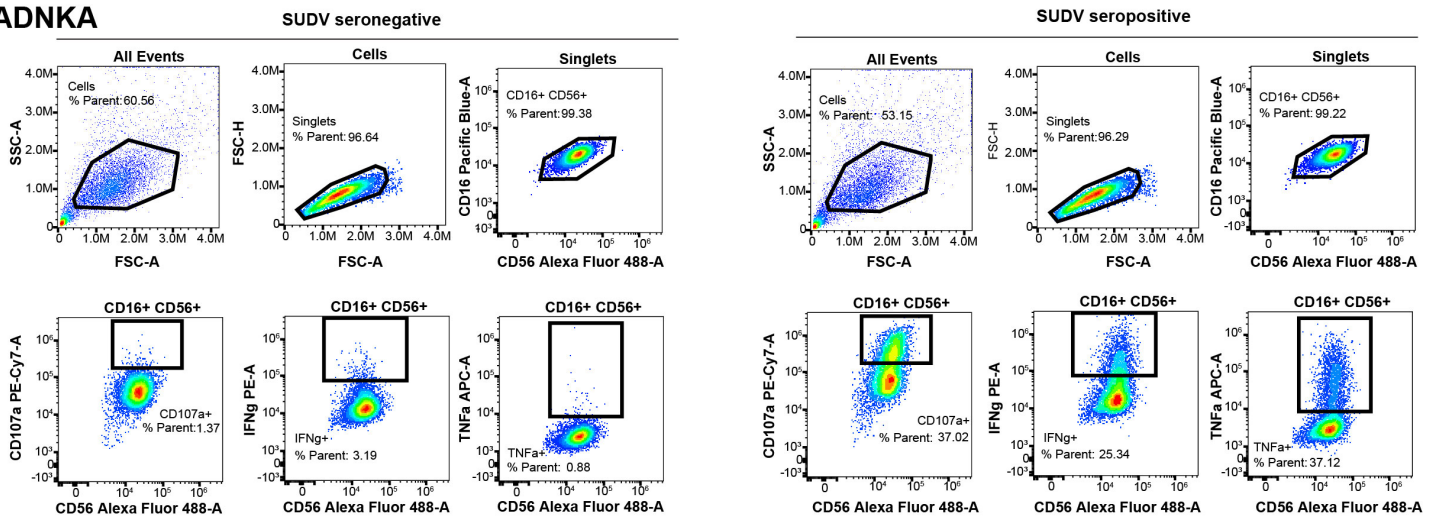

**Figure S1. Gating strategy for effector assays.**

The gating strategies for ADNP (A), ADCP (B), ADCD (C) and ADNKA (D) are shown for representative SUDV GP seronegative and seropositive samples as indicated.

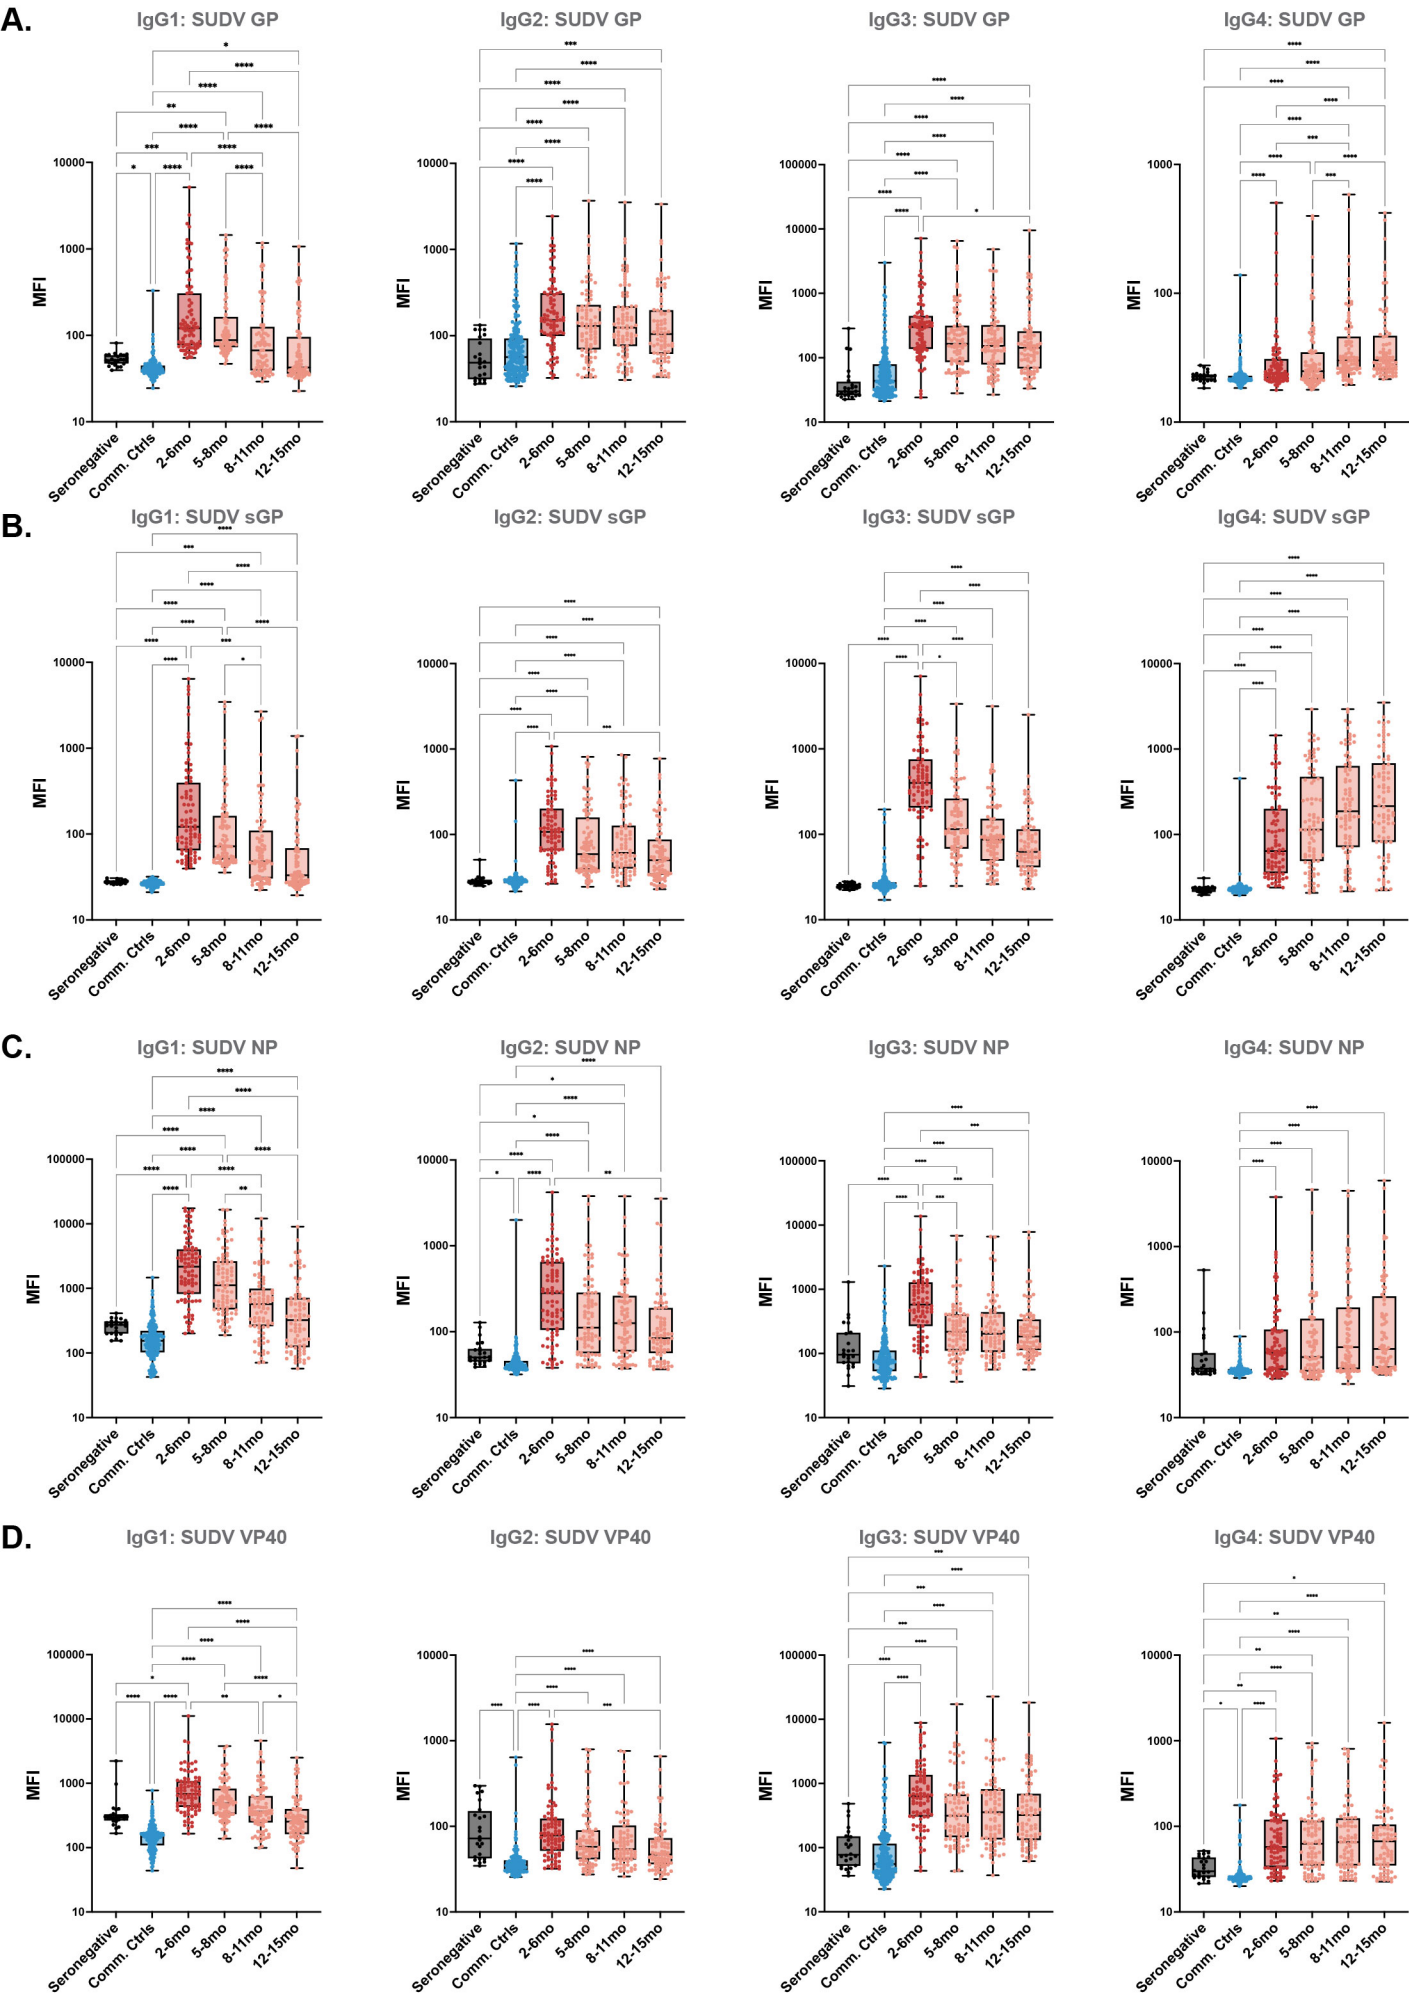

**Figure S2.** Levels of GP-specific IgG1, IgG2, IgG3, IgG4 (A), sGP-specific IgG1, IgG2, IgG3, IgG4 (B), NP-specific IgG1, IgG2, IgG3, IgG4 (C) and VP40-specific IgG1, IgG2, IgG3, IgG4 (D) were measured in seronegative controls (n=24), Uganda community controls (n=192), and SUDV survivors across 4 time-points. Kruskal-Wallis test with Dunn's correction for multiple comparisons.

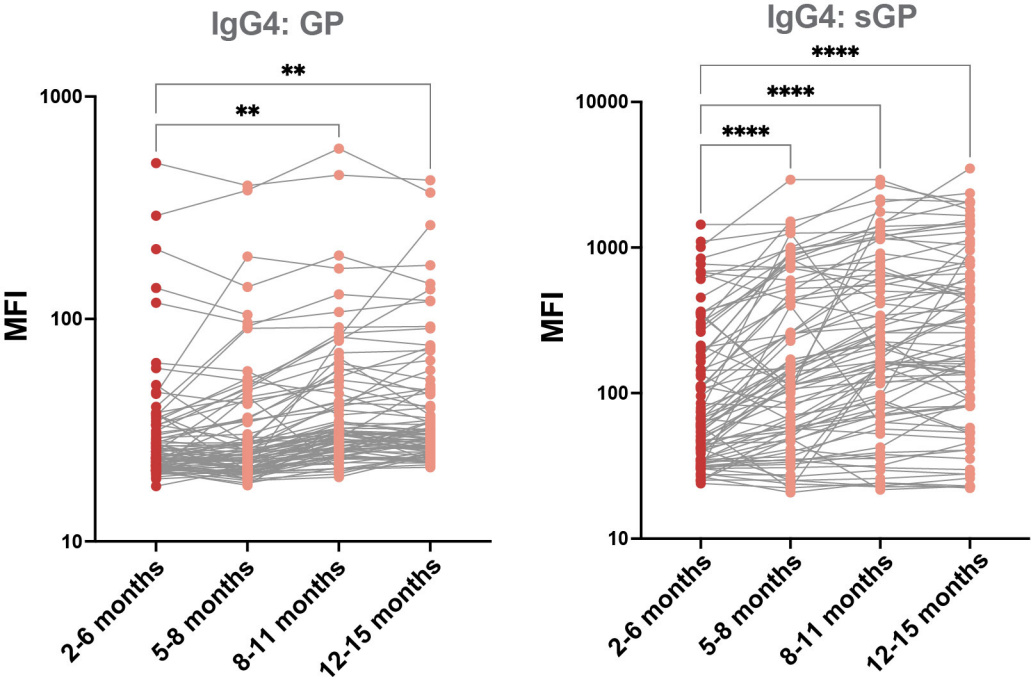

**Figure S3.** The GP- and sGP-specific IgG4 responses for each survivor is plotted longitudinally across the four timepoints (2-15 months). Mixed-effects analysis with Holm-Sidak's multiple comparison test was used to determine if later timepoints were significantly different from the enrollment (2-6 month) timepoint.

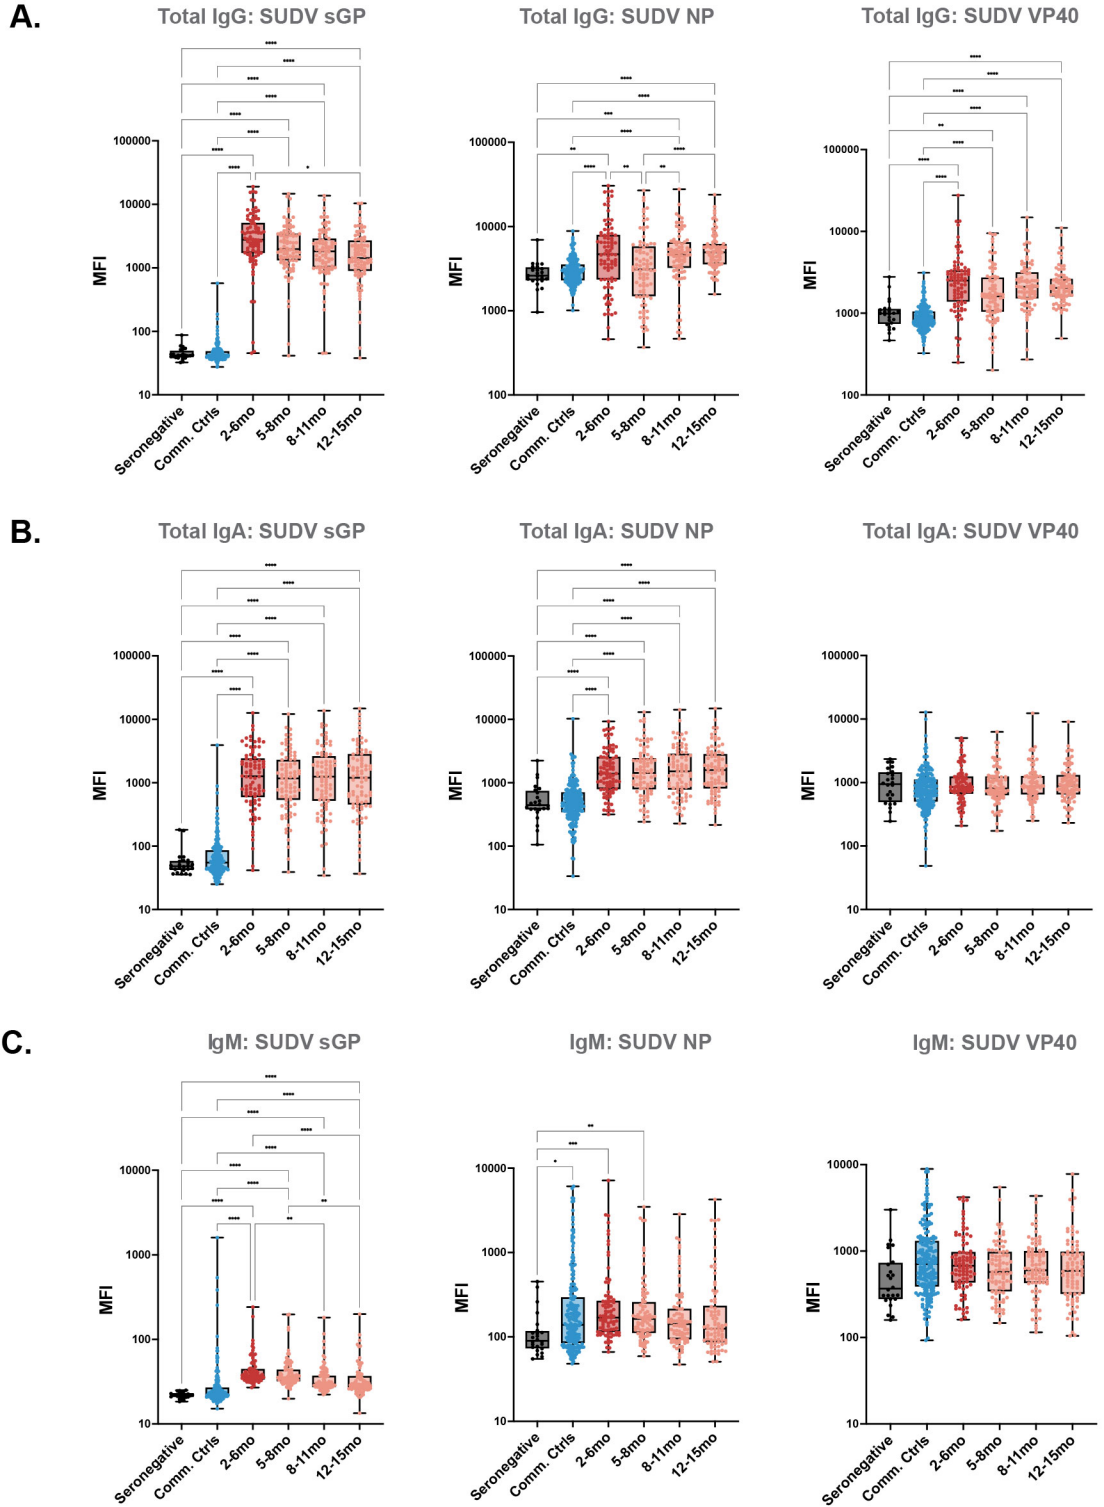

**Figure S4.** Levels of total IgG (A), total IgA (B), and IgM (C) were measured in seronegative controls (n=24), Uganda community controls (n=192), and SUDV survivors across 4 timepoints. Kruskal-Wallis test with Dunn's correction for multiple comparisons.

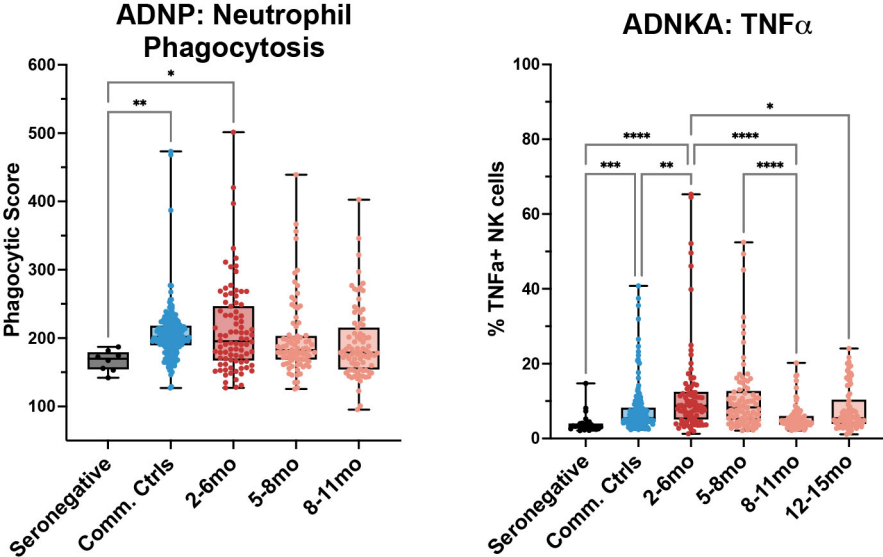

**Figure S5.** The ability of GP-specific antibodies to induce antibody-mediated neutrophil phagocytosis and antibody-mediated NK cell secretion of TNF $\alpha$  were measured for the indicated groups. Kruskal-Wallis test with Dunn's correction for multiple comparisons.

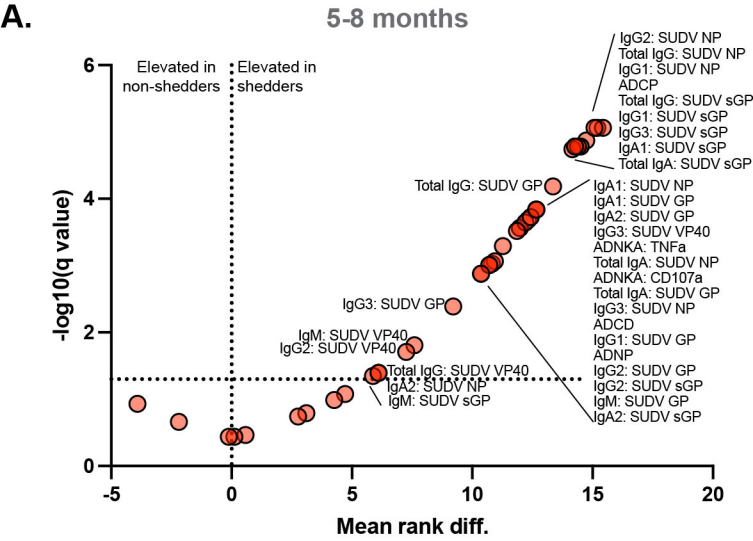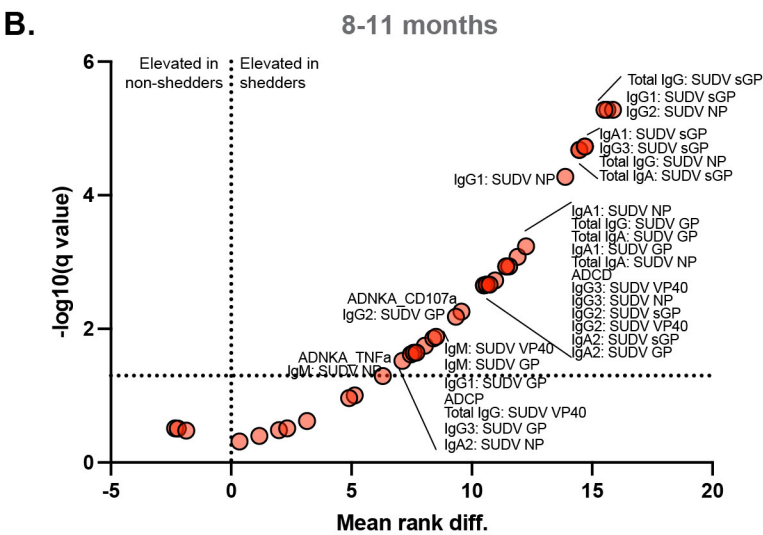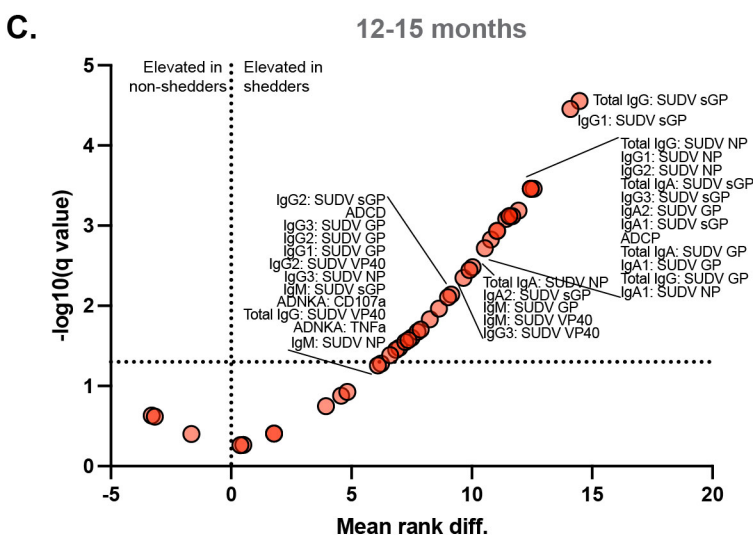

**Figure S6.** Volcano plot of a multiple Mann-Whitney tests across all SUDV-associated antibody features at the 5-8 months post-infection (A), 8-11 months post-infection (B), and 12-15 months post-infection (C) between survivors with and without persistent viral RNA. The dashed line on the y-axis ( $\log_{10} q \text{ value} = 1.3$ ) indicates a  $q\text{-value} < 0.05$  (corrected for multiple comparisons). The statistically significant features are indicated on graph, with features to the right are elevated in survivors with persistent viral RNA compared to those without.

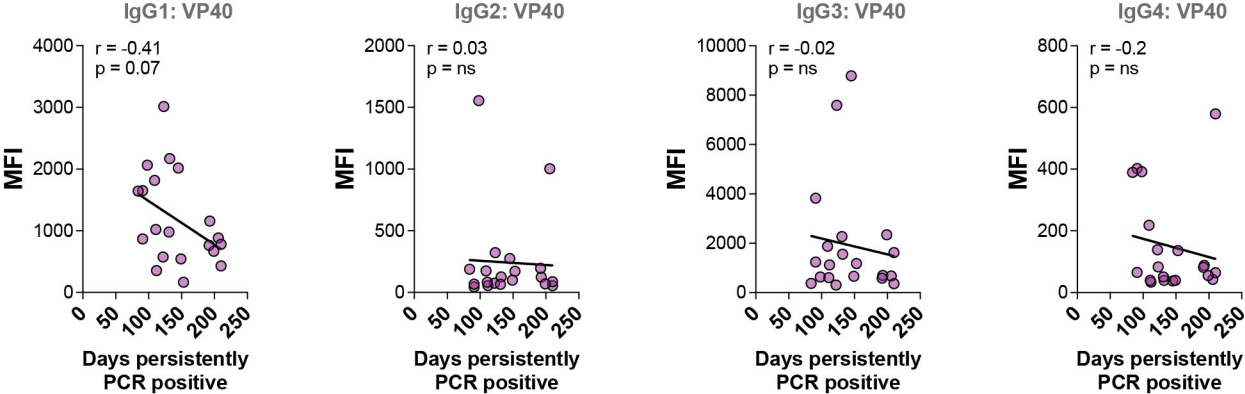

**Figure S7.** Spearman correlation analyses were performed between levels of VP40-specific IgG1, IgG2, IgG3, IgG4 at 2-6 months post-infection and days persistently RNA positive in survivors with persistent viral RNA. The spearman rho and p value are indicated on each graph.
